# Supplementary material
Source: Springer Nature journal article supplement (https://www.springermedizin.de/resource/supplementary/12889_2012_4710_MOESM2_ESM.pdf/9491918)
Supplement: MOESM2 [file 9491918]

| Week | Care manager (COP)                                                                                                                                                                                            | OT                                                                                     | Rheumatologist | Patient's OP |
|------|---------------------------------------------------------------------------------------------------------------------------------------------------------------------------------------------------------------|----------------------------------------------------------------------------------------|----------------|--------------|
| 1    | <p>First consultation: development of treatment plan</p> <p>Contact with rheumatologist and patient's OP concerning treatment plan</p> <p>Send communication form to rheumatologist, OT, and patient's OP</p> |                                                                                        |                |              |
| 2    |                                                                                                                                                                                                               | Start WI within 2 weeks; report about solutions to care manager, patient, and employer |                |              |
| 4    | Facilitate e-mail contact with OT, rheumatologist, and patient's OP                                                                                                                                           |                                                                                        |                |              |
| 6    | Second consultation: evaluation with patient                                                                                                                                                                  |                                                                                        |                |              |
| 8    | Facilitate e-mail contact with OT, rheumatologist, and patient's OP                                                                                                                                           |                                                                                        |                |              |
| 12   | Third consultation: evaluation with patient                                                                                                                                                                   | Send final report to care manager, patient, and employer                               |                |              |
